# Supplementary material
Source: MDPI journal article supplement (https://www.mdpi.com/2076-3417/10/23/8548)
Supplement: s1 [file s1]

## Supplementary material

Table S1. Detail of treatments used in this study.

| Treatment      | PHCs (5000 mg kg <sup>-1</sup> ) | Plant          | Biochar | <i>Enterobacter</i> MN17 |
|----------------|----------------------------------|----------------|---------|--------------------------|
| T <sub>0</sub> | - <sup>a</sup>                   | + <sup>b</sup> | -       | -                        |
| T <sub>1</sub> | +                                | -              | -       | -                        |
| T <sub>2</sub> | +                                | -              | -       | +                        |
| T <sub>3</sub> | +                                | -              | +       | -                        |
| T <sub>4</sub> | +                                | -              | +       | +                        |
| T <sub>5</sub> | +                                | +              | -       | -                        |
| T <sub>6</sub> | +                                | +              | +       | -                        |
| T <sub>7</sub> | +                                | +              | -       | +                        |
| T <sub>8</sub> | +                                | +              | +       | +                        |

*a*, a sign (-) point to nonexistence or exclusion of a particular additive/factor

*b*, a sign (+) point to existence or inclusion of a particular additive/factor

T<sub>0</sub>, Plant grown on the uncontaminated soil without microbe and biochar amendment (P<sub>0</sub>); T<sub>1</sub>, Contaminated soil without plants and amendments (UC); T<sub>2</sub>, Contaminated soil only with microbe amendment (E); T<sub>3</sub>, Contaminated soil only with biochar amendment (B); T<sub>4</sub>, Contaminated soil with microbe and biochar amendment (E+B); T<sub>5</sub>, Plant grown on the contaminated soil without microbe and biochar amendment (P); T<sub>6</sub>, Plant grown on the contaminated soil only with biochar amendment (P+B); T<sub>7</sub>, Plant grown on the contaminated soil only with microbe amendment (P+E); T<sub>8</sub>, Plant grown on contaminated soil with microbe and biochar amendment (P+E+B)

Table S2. Physicochemical properties of the soil used in the study.

| Parameters                                   | Soil                                               | Biochar     |
|----------------------------------------------|----------------------------------------------------|-------------|
| Texture                                      | Sandy loam (sand 52.8%, silt 25.4% and clay 21.8%) | -           |
| pH                                           | 7.95 ± 0.24                                        | 8.27 ± 1.25 |
| EC (dS m <sup>-1</sup> )                     | 1.99 ± 0.21                                        | 2.20 ± 0.40 |
| CEC (mmol <sub>c</sub> kg <sup>-1</sup> )    | 14.3 ± 1.73                                        | 46.5 ± 3.40 |
| Organic matter (%)                           | 0.55 ± 0.05                                        | -           |
| Total carbon (%)                             | -                                                  | 54.8 ± 4.65 |
| Total nitrogen (mg kg <sup>-1</sup> )        | 14.8 ± 3.20                                        | 16000 ± 285 |
| Available phosphorus (mg kg <sup>-1</sup> )  | 6.67 ± 1.09                                        | -           |
| Total phosphorus (g kg <sup>-1</sup> )       | -                                                  | 3.20 ± 0.26 |
| Extractable potassium (mg kg <sup>-1</sup> ) | 140 ± 8.55                                         | -           |
| Total potassium (g kg <sup>-1</sup> )        | -                                                  | 2.02 ± 0.29 |

EC, electrical conductivity; CEC, cation exchange capacity

Values represent means (n=3) ± standard deviation

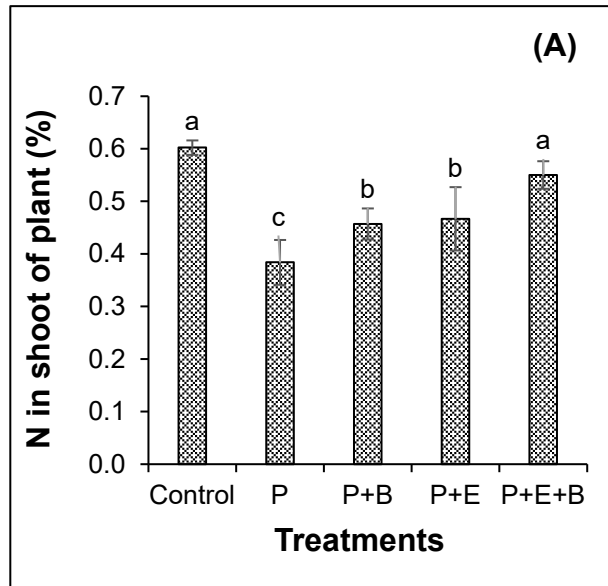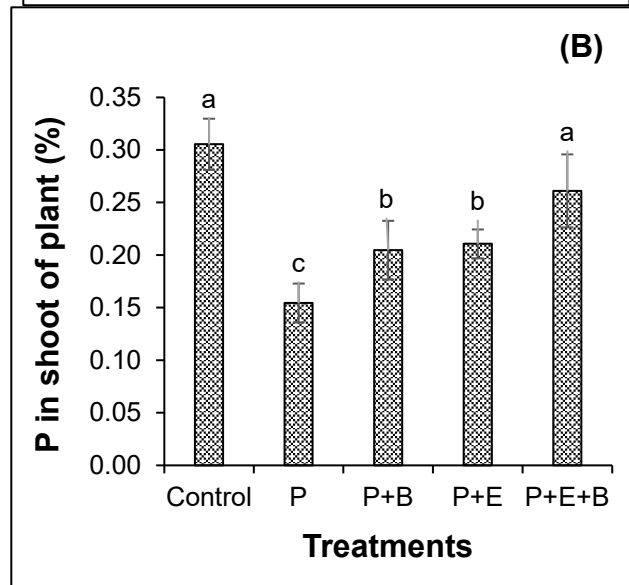

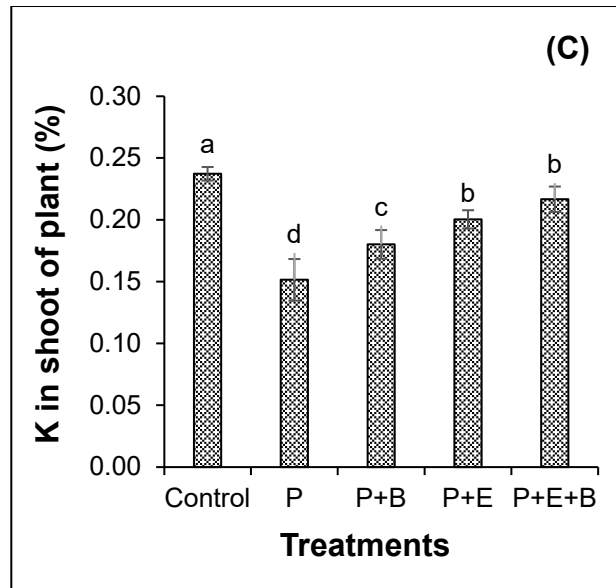

**Figure S1.** Effects of *Enterobacter* sp. MN17 and biochar on nitrogen (A), phosphorus (B), and potassium (C) in mungbean plants grown in PHCs contaminated soil. Values shown here were taken after 90 d of sowing. Columns and bars represent means and standard deviation, respectively of triplicate values. Means having different letters differ significantly according to LSD test at  $P \leq 0.05$ . (Control, Uncontaminated soil with plants; P, Contaminated soil with plants; P+B, Contaminated soil with plants and biochar; P+E, Contaminated soil with plants and *Enterobacter* sp. MN17; P+E+B, Contaminated soil with plants, *Enterobacter* sp. MN17 and biochar).
